# Supplementary material for: Pitfalls of DNA Quantification Using DNA-Binding Fluorescent Dyes and Suggested Solutions
Source: PubMed Central journal article supplement (PMC4777359; doi:10.1371/journal.pone.0150528), 2016-03-03
Supplement: pone.0150528.s001.pdf [file pone.0150528.s001.pdf]

| Standard         | NanoDrop | Mixture |       |       |       |       |       |       |        |        |        |        |
|------------------|----------|---------|-------|-------|-------|-------|-------|-------|--------|--------|--------|--------|
|                  |          | 1       | 2     | 3     | 4     | 5     | 6     | 7     | 8      | 9      | 10     | 11     |
| dsDNA<br>(ng/μl) | DNA-50   | 20.2    | 17.3  | 14.7  | 12.3  | 10.1  | 8.1   | 6.3   | 4.5    | 2.9    | 1.4    | 0.0    |
| ssDNA<br>(ng/μl) | DNA-50   | 0.0     | 2.8   | 5.4   | 7.8   | 10.0  | 12.0  | 13.9  | 15.6   | 17.2   | 18.7   | 20.1   |
|                  | ssDNA-33 | (0.0)   | (1.9) | (3.7) | (5.3) | (6.8) | (8.1) | (9.4) | (10.5) | (11.6) | (12.7) | (13.6) |

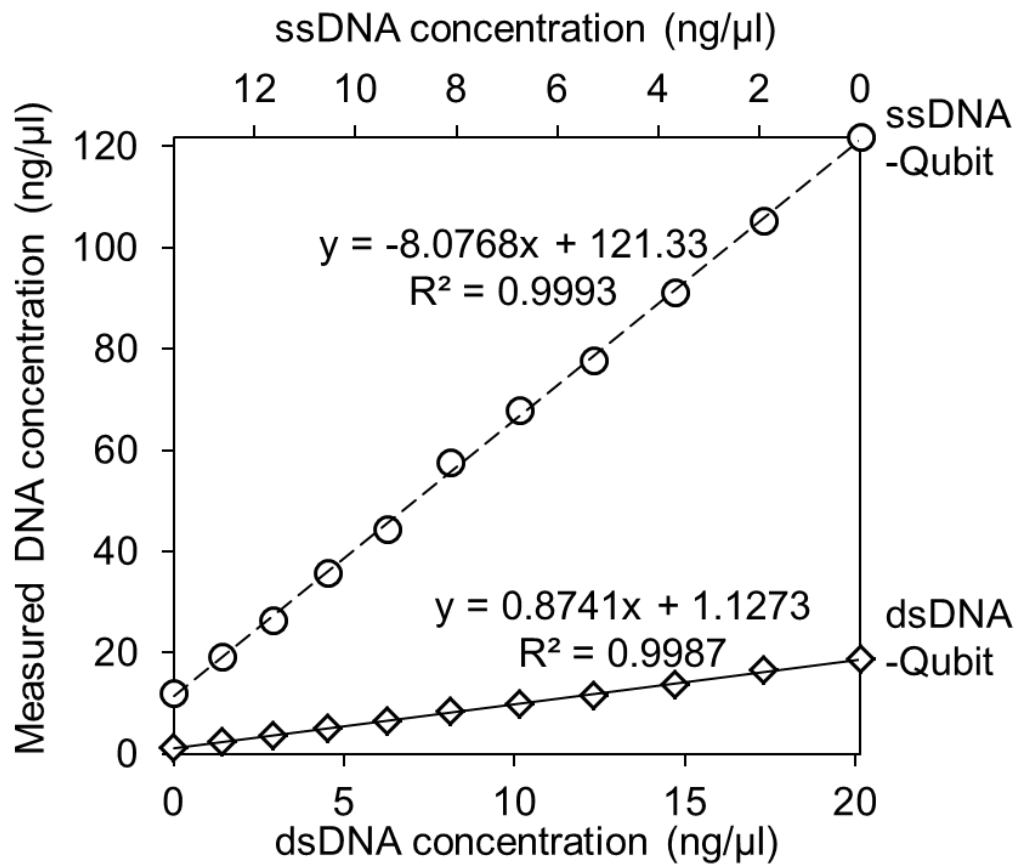

**S1 Fig. Standard curves of single-stranded DNA quantification**

The table shows how to prepare various mixtures of dsDNA and ssDNA using 20 ng/μl of each, as determined by the dsDNA mode (DNA-50) of NanoDrop. The absolute concentration of ssDNA was determined by the ssDNA mode

(ssDNA-33), and that of each standard solution is shown in parentheses. After measuring the mixtures with Qubit dsDNA (diamonds) and Qubit ssDNA (circles), standard curves were prepared (lower panel).
