# Supplementary material for: Pitfalls of DNA Quantification Using DNA-Binding Fluorescent Dyes and Suggested Solutions
Source: PubMed Central journal article supplement (PMC4777359; doi:10.1371/journal.pone.0150528), 2016-03-03
Supplement: pone.0150528.s002.pdf [file pone.0150528.s002.pdf]

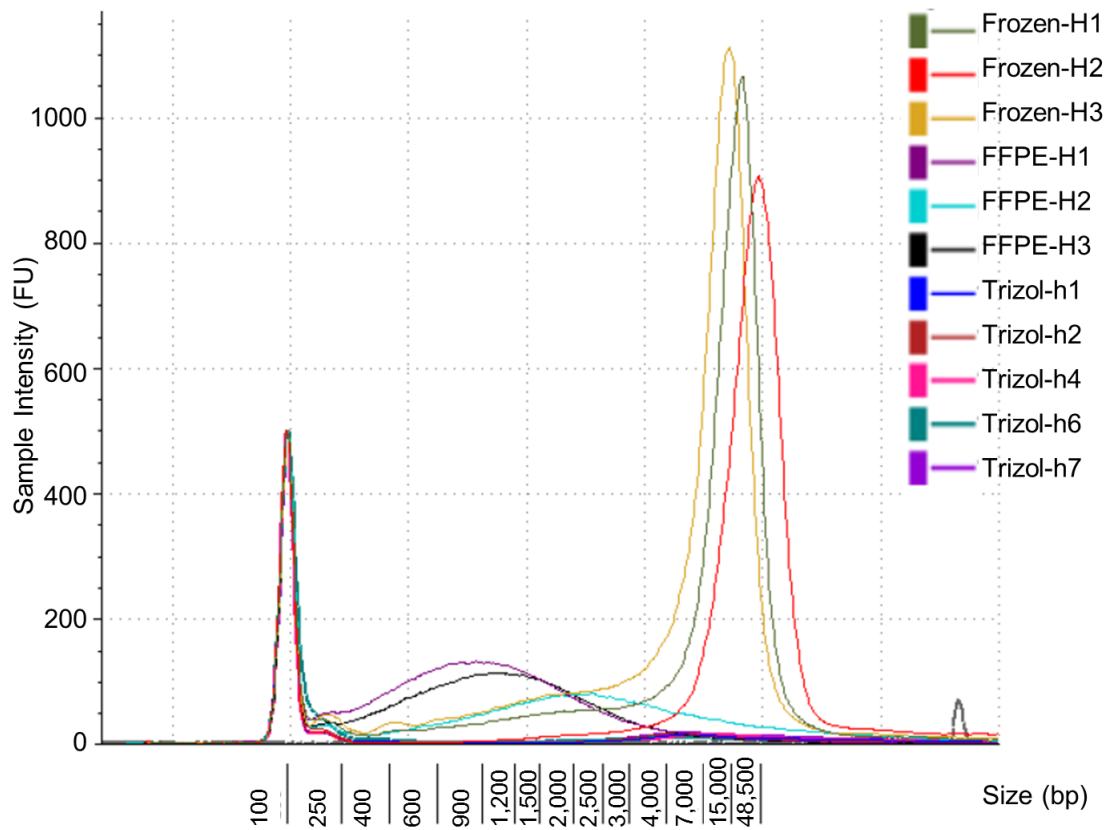

**S2 Fig. Fluorescent electropherogram of Frozen-DNA, FFPE-DNA and Trizol-DNA measured by the 2200 TapeStation.**

The gel image of Fig 2 is presented as an electropherogram overlay.
