# Supplementary material for: Pitfalls of DNA Quantification Using DNA-Binding Fluorescent Dyes and Suggested Solutions
Source: PubMed Central journal article supplement (PMC4777359; doi:10.1371/journal.pone.0150528), 2016-03-03
Supplement: pone.0150528.s004.pdf [file pone.0150528.s004.pdf]

S1 Table. Primer sequences used in this study

| PCR length (bp) | Primer sequence (5'-3') |                             |
|-----------------|-------------------------|-----------------------------|
| 317             | F                       | GGA TGA TAC GGT CTG CTT CG  |
|                 | R                       | TGG CTG GCA ATA AAC AAC AA  |
| 499             | F                       | CTA CCA GCC CAC GCT TCT T   |
|                 | R                       | AAC CGC AAT CCT ACA CAA CC  |
| 741             | F                       | CCC CTG GTG TAA AAG GCT CT  |
|                 | R                       | TTC TGT AAG CAG CAA TGT TTG |
| 1357            | F                       | = 741F                      |
|                 | R                       | = 317R                      |
| 2995            | F                       | = 741F                      |
|                 | R                       | GTG GCT GGA CTG GAT TTT G   |
