# Supplementary material for: Pitfalls of DNA Quantification Using DNA-Binding Fluorescent Dyes and Suggested Solutions
Source: PubMed Central journal article supplement (PMC4777359; doi:10.1371/journal.pone.0150528), 2016-03-03
Supplement: pone.0150528.s005.pdf [file pone.0150528.s005.pdf]

**S2 Table. NanoDrop data of original solutions of DNA**

| <b>DNA</b>       | <b>Conc<br/>(ng/<math>\mu</math>l)</b> | <b>OD<sub>260/280</sub></b> | <b>OD<sub>260/230</sub></b> |
|------------------|----------------------------------------|-----------------------------|-----------------------------|
| <b>Frozen-H1</b> | 1497                                   | 1.89                        | 2.06                        |
| <b>Frozen-H2</b> | 660                                    | 1.93                        | 2.06                        |
| <b>Frozen-H3</b> | 815                                    | 1.88                        | 1.97                        |
| <b>Frozen-H4</b> | 1273                                   | 1.92                        | 2.18                        |
| <b>Frozen-H5</b> | 409                                    | 1.86                        | 2.08                        |
| <b>Frozen-H6</b> | 359                                    | 1.86                        | 2.07                        |
| <b>Frozen-R1</b> | 834                                    | 1.90                        | 2.33                        |
| <b>Frozen-R2</b> | 1046                                   | 1.90                        | 2.35                        |
| <b>Frozen-R3</b> | 1082                                   | 1.89                        | 2.30                        |
| <b>Frozen-R4</b> | 1137                                   | 1.88                        | 2.38                        |
| <b>Frozen-R5</b> | 922                                    | 1.89                        | 2.38                        |
| <b>FFPE-H1</b>   | 512                                    | 1.76                        | 1.66                        |
| <b>FFPE-H2</b>   | 1433                                   | 1.81                        | 1.36                        |
| <b>FFPE-H3</b>   | 345                                    | 1.74                        | 1.22                        |
| <b>Trizol-h1</b> | 492                                    | 1.82                        | 2.05                        |
| <b>Trizol-h2</b> | 328                                    | 1.91                        | 2.19                        |
| <b>Trizol-h3</b> | 441                                    | 1.83                        | 2.25                        |
| <b>Trizol-h4</b> | 428                                    | 1.85                        | 2.15                        |
| <b>Trizol-h5</b> | 744                                    | 1.87                        | 1.28                        |
| <b>Trizol-h6</b> | 419                                    | 1.88                        | 0.87                        |
| <b>Trizol-h7</b> | 1224                                   | 1.90                        | 2.07                        |
